# Supplementary material
Source: publisher figshare collection journal article supplement (https://gsapubs.figshare.com/ndownloader/files/33619715)
Supplement: Supplementary file 1 [file 33619715]

## Sheet: Sheet1
Table S3 Iron isotope and elemental compositions of volcanic samples in this study
Sample ID	Unit/location	Lat. (°S)	Long. (°W)	Rock type	Principal mineralogy		Fe isotope compositions						Major element compositions (wt%)												Trace element compositions (ppm)
							δ56Fe (‰)	2SD	δ57Fe (‰)	2SD	n		SiO2	TiO2	Al2O3	FeOT	MnO	MgO	CaO	Na2O	K2O	P2O5	Total		La	Ce	Pr	Nd	Sm	Eu	Gd	Tb	Dy	Ho	Er	Tm	Yb	Lu	Y	Rb	Sr	Ba	Pb	Cs	U	Th	Zr	Hf	Nb
Lavas traversing normal crust
Premigration (~33-19 Ma)
CO282	Otiga	29.3254	69.8917	Trachyandesite	Bt		0.0320987	0.0409255	0.0448333	0.181475	3		57.9023	0.582708	17.2445	5.2662	0.242403	2.47063	8.43797	5.5058	2.03101	0.332304	100.016		33.5543	72.536		36.6989	6.75947	1.63095		0.78993					2.75539	0.39431			640.729	1117.94		5.60562	0.901018	3.09147		6.4076
CO280	Lama	29.3337	69.9732	Dacite	Bt, Amp		0.0792301	0.03671	0.128167	0.0416333	3		64.43	0.563164	16.0593	4.96012	0.12416	2.68974	5.43605	3.61	1.76557	0.407124	100.045		17.8484	38.9349		17.7196	3.67967	0.886172		0.470642					1.76193	0.266814			434.348	534.156		3.01141	0.901044	4.469		3.60041
CO174	Tilito	28.184	69.1797	Dacite	Bt		0.00666667	0.0416333	0.00483333	0.0305505	3		69.1701	0.2919	14.4886	2.39	0.07746	0.98651	2.41328	3.93	2.66239	0.110526	99.3607		26.817	58.118		21.325	4.2595	0.593		0.415					1.77715	0.263	15	123	251.89	644.728	13.5	9.6207	4.4584	12.3267	147	3.8165	13.5
CO271b	Escabroso	28.7442	69.5985	Basaltic trachyandesite	Amp		0.09	0.01	0.12	0.03	3		55.0083	0.718458	18.045	5.88017	0.162744	2.04264	9.69931	4.92382	2.43191	0.256687	99.1691		32.7948	74.1695		40.0376	7.40318	1.80372		1.0162					3.03354	0.428179			674.039	855.006		1.19715	1.21442	5.88343		6.62569
CO250	Penas Negras	28.3142	69.3795	Basaltic andesite	Amp, Pl		0.0715074	0.0217314	0.0781667	0.080829	3		55.8996	0.831168	19.343	6.95	0.14952	3.73891	8.03925	3.27	1.41253	0.246745	99.8807		17.1532	38.0776		19.2759	3.9319	1.104		0.559					2.03115	0.27			449.801	376.012		0.7204	0.5676	2.7679		3.3758
CO263	Escabroso/Macho Muerto	28.5368	69.5125	Andesite	Ol, Cpx, Pl		0.11017	0.0140892	0.168167	0.0305505	3		59.577	1.10869	17.6977	5.90066	0.142551	3.44466	6.10677	3.78818	2.09033	0.111731	99.9683		19.4677	40.4997		18.808	3.83167	1.03717		0.497885					1.79887	0.245631			450.761	551.833		2.20234	1.39375	4.02586		3.8452
CO240	Potro Glacier	28.4203	69.611	Trachydacite	Pl, Bt, Qtz		0.0706034	0.0362909	0.0595	0.21	4		63.1574	0.579805	17.7254	4.9841	0.189232	2.38879	2.53	4.64	3.55734	0.182179	99.9387		37.0467	73.7501		28.7731	5.649	1.353		0.673					2.6609	0.387			417.916	1953.6		7.4145	1.5936	6.7384		5.7633
CO246	Vincuna	28.2235	69.4263	Dacite	Amp, Pl, Qtz		0.09	0.03	0.164	0.10247	4		63.2897	0.586529	17.5713	5.30993	0.0865263	1.27781	5.36085	3.66569	2.71351	0.228499	100.09		28.498	57.6571		24.5936	4.66645	1.11808		0.515518					1.99601	0.288226			272.343	734.545		1.60139	2.05269	8.57694		4.19591
CO236	Vincuna	28.3935	69.4762	Dacite	Bt, Pl, Qtz		0.05	0.04	0.1115	0.131149	3		63.8869	0.504798	16.0315	5.29	0.137242	2.37728	5.60904	3.2436	2.78322	0.147759	100.011		24.1634	51.1045		17.9746	3.9671	0.968		0.523					1.9103	0.289			406.29	667.797		1.7378	3.5526	12.2565		3.5324
CO299	Escabroso/Rio de la Sal	28.8253	69.5697	Basaltic andesite	Opx, Cpx		0.0570993	0.0325835	0.0681667	0.127017	3		52.1273	1.18005	18.9501	9.74345	0.212719	4.1278	9.00618	3.79123	1.23244	0.315498	100.687		22.062	49.3318		28.5885	6.09079	1.77372		0.87048					2.40224	0.34398			665.136	524.571		2.22569	0.649701	2.63063		5.22393
CO296	Escabroso/Rio de la Sal	28.869	69.6468	Andesite	Glassy		0.0953045	0.0472772	0.1515	0.173205	3		60.5528	0.789147	17.5395	5.72129	0.172517	2.34637	5.94211	4.08663	1.82299	0.342486	99.3159		22.8165	51.5633		23.7075	5.2068	1.274		0.715					2.2235	0.31			488.576	454.529		1.6656	1.4101	5.2991		4.6625
Premigration (~18-10 Ma)
CO292	Escabroso/Cerro de la Sal	28.7711	69.6384	Andesite	Cpx, Pl		0.193543	0.0310073	0.2715	0.121655	3		58.3261	0.713438	18.4828	6.49861	0.188042	3.06408	6.96278	3.15467	1.55012	0.283075	99.2237		22.4038	46.6987		21.4845	4.77539	1.2643		0.61852					2.21436	0.329			541.744	353.373		1.08582	0.810092	4.17416		4.34308
CO300	Escabroso/Rio de la Sal	28.8253	69.5697	Basaltic andesite	Cpx, Ol, Pl		0.149272	0.0266174	0.234833	0.0757188	3		54.5285	0.733155	19.9577	6.46704	0.16661	2.59107	9.74011	3.57295	1.50936	0.241211	99.5078		20.4384	45.3713		23.3831	4.79408	1.31569		0.668179					2.313	0.328854			594.419	409.363		2.12798	0.76503	3.75448		3.9096
CO295	Escabroso/Rio de la Sal	28.8682	69.641	Basaltic andesite	Cpx, Pl		0.12577	0.06	0.2015	0.069282	3		55.9401	1.13431	18.825	7.51365	0.139768	3.25467	7.77682	3.87302	1.68746	0.235896	100.381		22.2141	48.2525		25.0677	5.34142	1.45744		0.76109					2.5047	0.35937			538.575	447.228		3.9521	1.06081	4.44082		4.93934
CO239	Penas Negras	28.4335	69.525	Andesite	Amp, Bt, Pl, Qtz		0.138596	0.00217048	0.2415	0.04	3		57.3738	0.765631	18.035	5.92998	0.226634	3.661	8.02556	3.44065	1.80371	0.210559	99.4725		18.652	40.1762		18.9023	3.95329	0.934548		0.47356					1.67627	0.245162			499.238	564.58		0.468427	1.08594	3.5605		3.57758
CO241	Vincuna	28.4903	69.7123	Andesite	Amp		0.13	0.02	0.204833	0.090185	3		62.583	0.665918	17.564	4.86	0.113272	2.12872	5.37415	4.27	2.09876	0.224615	99.8824		26.7	59.0392		28.6369	5.2649	1.10579		1.18285					1.96355	0.259685			704.928	818.968		2.47713	1.85339	7.54549		4.87342
CO235	Vincuna	28.4975	69.6355	Trachydacite	Bt, Pl		0.172554	0.0265753	0.25	0.14	3		65.1065	0.370403	16.3426	2.3985	0.12133	1.21276	4.46835	5.43	4.65543	0.00160348	100.107		33.9834	69.5811		28.041	4.46146	0.96309		0.45264					1.95115	0.2829			182.132	1190.02		4.92295	2.44376	9.2924		6.74434
CO166	Macho Muerto	28.4643	69.4843	Rhyolite	Qtz		0.123445	0.0336323	0.234833	0.064291	3		70.7886	0.365179	15.5164	2.4969	0.0891831	0.952059	3.02071	3.9909	3.3717	0.127789	100.719		25.0289	54.6123		17.5798	3.47617	0.65366		0.33495					1.5702	0.24157			262.885	863.765		2.78008	3.6134	9.8656		4.14634
Lavas traversing thick crust
Pre-migration volcanic group (~9-7 Ma)
CO72	Los Aparejos	27.66	68.336	Basaltic andesite	Ol		0.125845	0.0497693	0.1615	0.0424264	5		52.64	1.09	15.23	7.25	0.13	8.64	8.47	3.49	1.77	0.28	98.99		32	65.3		31.9	5.58	1.5		0.56					1.5	0.223	18	32	897	744	9	0.4	0.9	3.5	133	3.7	8
CO24	Los Aparejos	27.629	68.339	Basaltic andesite	Cpx, Ol, Pl		0.120961	0.0468528	0.1615	0.034641	5		53.25	1.04	15.33	7.8	0.13	8.37	8.02	3.36	1.68	0.24	99.22		28.5	63	7.88	31.2	5.73	1.61	4.5	0.67	3.7	0.74	1.91	0.298	1.7	0.25	19.9	31	767	624	8.3	0.9	0.85	4.1	185	4	10.2
CO428	Dos Hermanos	27.626	69.08	Trachyandesite	Cpx		0.144038	0.0286162	0.2155	0.0609918	5		58.95	1.15	16.8	4.69	0.09	3.18	6.5	4.5	2.86	0.4	99.12		62.8	10.8	1.87	56.1	8.64	2.31	5.1	0.62	2.9	0.5	1.18	0.17	1	0.134	13.7	64	1402	1231	13	1	1.26	1.1	256	5.3	12.7
CC81	Dos Hermanos	27.615	69.065	Trachyandesite	Cpx		0.132656	0.0509791	0.19	0.1	5		57.34	1.05	17.66	5.52	0.09	3.03	6.37	4.62	2.61	0.45	98.74		57.6	11.7	1.63	51.1	7.86	2.24	4.5	0.61	2.9	0.51	1.19	0.174	1	0.14	14.4	66	1278	1156	14.6	2	1.41	8.7	219	5.8	12.9
Syn-migration Pircas Negras volcanic group(~7-3 Ma)
CC262	Valle Ancho	27.347	68.954	Basaltic andesite	Cpx, Ol		0.17	0.04	0.279389	0.0177834	4		54.96	1.28	16.59	7.44	0.12	5.1	7.96	3.75	1.6	0.28	99.08		24.2	54.8	6.77	27.7	5.68	1.81	4.7	0.61	3.2	0.55	1.51	0.197	1.3	0.185	16.8	35	672	588	6.6	0.9	0.77	2.9	192	4.8	10.3
CC101	Valle Ancho	27.359	68.924	Basaltic andesite	Cpx, Ol		0.127281	0.0271123	0.19	0.08	3		55.47	1.21	16.46	7.31	0.13	5.7	7.55	3.39	1.58	0.29	99.09		23.9	52.5	6.47	26.3	5.44	1.73	4.7	0.62	3.3	0.59	1.64	0.216	1.4	0.205	18.3	35	612	555	7.1	1.3	0.77	3	190	4.7	9.9
CC254	Los Patos	27.278	68.784	Andesite	Amp, Cpx		0.132753	0.03	0.2	0.1	5		57.11	1.11	16.42	6.54	0.12	4.2	7.46	4.01	1.98	0.32	99.27		35.1	67.6		34.2	6.12	1.61		0.65					1.3	0.181		46	778	759	6	0.7	1.03	5.4	172	5.1	9.9
CC17y	La Gallina	27.733	69.196	Trachyandesite	Amp, Cpx		0.19	0.04	0.251073	0.0743873	4		58.39	0.93	17.81	5.6	0.09	3.51	6	4.42	2.34	0.4	99.49		42.2	84.5		37.8	5.99	1.63		0.56					1	0.137	11	55	740	854	7	1.5	1.23	6.4	231	5.3	12
CO416	Cerro Casale	27.864	69.269	Trachyandesite	Amp, Cpx		0.165707	0.0261222	0.218167	0.011547	3		58.91	1.15	17.51	5.14	0.09	2.77	6.86	4.8	2.18	0.57	99.98		30.4	61.2	8.3	32.9	6.11	1.81	4.4	0.5	2.3	0.36	0.98	0.124	0.8	0.114	11.9	55	850	810	8.9	1.9	1.11	3.8	231	5.5	12
CO160	Laguna Brava	28.309	68.804	Andesite	Amp, Cpx, Ol		0.128987	0.01	0.197018	0.0204024	4		59.21	0.78	15.83	5.28	0.09	4.33	6.03	3.78	2.32	0.24	97.9		32.5	69.5		32.3	4.93	1.42		0.91					1.5	0.214	17	77	699	727	9	4	2.68	6	222	5.2	10
CO175	Río Peñas Negras	28.113	69.208	Trachyandesite	Amp, Cpx		0.121253	0.0398164	0.1715	0.02	3		60.57	0.93	16.67	4.96	0.08	2.55	5.74	4.68	2.3	0.37	98.86		41.8	86.4		37.7	6.48	1.68		0.52					0.8	0.11	11	56	897	1002	8	1.7	1.5	5.2	249	5.8	12
CC297	Rodrigo	26.989	68.766	Trachyandesite	Cpx, Opx		0.17	0.03	0.232852	0.0505969	4		60.91	0.79	16.32	4.23	0.07	2.45	5.14	4.23	3.08	0.24	97.46		39.5	72.6		32.6	5.42	1.24		0.45					0.8	0.1		74	657	901	7	1.3	1.49	8.6	213	5.5	6.9
CO177	Río Salado	28.001	69.168	Trachyandesite	Amp, Cpx		0.137977	0.0454793	0.2065	0.116046	4		61.9	0.89	16.82	4.35	0.06	1.92	4.73	4.67	2.9	0.3	98.55		46.1	92.8		43.2	7.27	1.42		0.47					0.8	0.109	11	65	824	1033	10	1	1.32	7.2	289	6.8	10
CO502	Laguna Brava	28.22	69.021	Dacite	Amp, Cpx		0.12803	0.0297812	0.228167	0.046188	3		63.26	0.92	16.43	4.29	0.04	2.24	4.87	4.64	2.93	0.35	99.97		42.2	94.2		44.3	6.6	1.82		0.57					0.9	0.108			773	1081		1.9	1.24	6.2		6.7
Note: 'n': number of replicate measurements. 'Migration': arc front migration. Abbreviations: Bt = biotite, Amp = amphibole, Pl = plagioclase, Ol = olivine, Cpx = clinopyroxene, Qtz = quartz, Opx = orthopyroxene
[truncated: 8 more columns]

## Sheet: G49705
Du, D.-H., Tang, M., Li, W., Kay, S.M., and Wang, X.-L., 2022, What drives Fe depletion in calc-alkaline magma differentiation: Insights from Fe isotopes: Geology, https://doi.org/10.1130/G49705.1
